# Supplementary material for: Aerosol Optical Properties and Type Retrieval via Machine Learning and an All-Sky Imager
Source: MDPI journal article supplement (doi:10.3390/atmos14081266), 2023-08-10
Supplement: s1 [file s1]

Archive with 1 entries (1 files):
- atmosphere-2502251-supplementary.pdf
